# Supplementary material for: Effects of disinfectants and particles on the occurrence of different microorganisms in drinking water distribution systems
Source: Royal Society of Chemistry journal article supplement (doi:10.1039/d0ew01119c), 2021-01-01
Supplement: d0ew01119c1.pdf [file d0ew01119c1.pdf]

## Supporting Information

### Effects of disinfectants and particles on occurrence of different microorganisms in drinking water distribution systems

Lixin Huo<sup>a,b</sup>, Linlin Pan<sup>b,c</sup>, Ruya Chen<sup>b,c</sup>, Baoyou Shi<sup>b,c</sup>, Haibo Wang<sup>b,c,\*</sup>,  
Shouyang He<sup>a</sup>

<sup>a</sup>Key Laboratory of Karst Georesources and Environment, Ministry of Education,  
Guizhou University, Guiyang, 550025, China.

<sup>b</sup>Key Laboratory of Drinking Water Science and Technology, Research Center for  
Eco-Environmental Sciences, Chinese Academy of Sciences, Beijing, 100085, China.

<sup>c</sup>University of Chinese Academy of Sciences, Beijing, 100049, China.

#### **\*Corresponding author:**

Address: Key Laboratory of Drinking Water Science and Technology, Research  
Center for Eco-Environmental Sciences, Chinese Academy of Sciences, 18 Shuang-  
qing Road, Beijing 100085, China.

E-mail: [hbwang@rcees.ac.cn](mailto:hbwang@rcees.ac.cn) (Haibo Wang)

**Table S1** The primers, probes and amplification programs of opportunistic pathogens

| Targeted microbe              | Targeted genes | Primer sequences                                                                         | Size (bp) | Program                                                                                 |
|-------------------------------|----------------|------------------------------------------------------------------------------------------|-----------|-----------------------------------------------------------------------------------------|
| <i>Legionella spp</i>         | 23S rRNA       | F: CCCATGAAGCCCGTTGAA<br>R:ACAATCAGCCAATTAGTACGAGTTAGC<br>P:TCCACACCTCGCCTATCAACGTCGTAGT | 92        | 95°C for 2 min, 40 cycles of 95°C for 5 s and 58.5°C for 10 s <sup>1</sup>              |
| <i>Legionella pneumophila</i> | <i>mip</i>     | F:AAAGGCATGCAAGACGCTATG<br>R:GAAACTTGTTAAGAACGTCTTTCA TTTG<br>P:TGGCGCTCAATTGGCTTTAACCGA | 78        | 95°C for 2 min, 40 cycles of 95°C for 5 s and 60°C for 10 s <sup>1</sup>                |
| <i>Mycobacteria spp.</i>      | 16S rRNA       | F:CCTGGGAAACTGGGTCTAAT<br>R: CGCACGCTCACAGTTA<br>P:TTTCACGAACAACGCGACAAACT               | 462       | 95°C for 2 min, 40 cycles of 95°C for 5 s, 55°C for 15 s and 72°C for 10 s <sup>1</sup> |
| <i>Mycobacteria avium</i>     | 16S rRNA       | F : AGAGTTTGATCCTGGCTCAG<br>R : ACCAGAAGACATGCGTCTTG                                     | 180       | 98°C for 2 min, 40 cycles of 98°C for 5 s and 68°C for 18 s <sup>1</sup>                |
| <i>Pseudomonas aeruginosa</i> | <i>oprI</i>    | F:GACGTACACGCGAAAGACCT<br>R:GCCCAGAGCCATGTTGTA CT                                        | 99        | 95°C for 5 min, 40 cycles: 95°C for 15 s, 60°C for 45 s <sup>2</sup>                    |
| <i>Acanthamoeba spp</i>       | 18S rRNA       | F: TTTTCAGTTGGTTTTGGCAG<br>R: GGTCGGCATCGTTTATGG                                         | 219       | 95°C for 2 min, 40 cycles of 95°C for 5 s and 60°C for 10 s <sup>3</sup>                |
| <i>Harmanella vermiformis</i> | 18S rRNA       | F: TTACGAGGTCAGGACACTGT<br>R: GACCATCCGGAGTTCTCG                                         | 512       | 98°C for 2 min, 40 cycles of 98°C for 5 s, 72°C for 18 s <sup>1</sup>                   |
| Total bacteria                | 16S rRNA       | F: CGGTGAATACGTTTCYCGG<br>R: GGYTACCTTGTTACGACTT<br>P: CTTGTACACACCGCCCGTC               | 124       | 95°C for 30 s, 35 cycles of 95°C for 15 s and 56°C for 60 s <sup>1</sup>                |

**Table S2** Quantification limits and amplification efficiencies for qPCR

| Target microorganism          | Quantification limit<br>(gene copies/ $\mu$ L DNA) | Slope  | Amplification<br>efficiency (%) | R <sup>2</sup> |
|-------------------------------|----------------------------------------------------|--------|---------------------------------|----------------|
| <i>Legionella</i> spp.        | 4                                                  | -3.410 | 96.43                           | 0.9962         |
| <i>Legionella pneumophila</i> | 6                                                  | -3.411 | 96.43                           | 0.9561         |
| <i>Mycobacteria</i> spp.      | 7                                                  | -3.331 | 99.62                           | 0.9918         |
| <i>Mycobacterium avium</i>    | 4                                                  | -3.388 | 97.33                           | 0.9779         |
| <i>Pseudomonas aeruginosa</i> | 67                                                 | -3.420 | 96.06                           | 0.9921         |
| <i>Acanthamoeba</i> spp.      | 18                                                 | -3.516 | 92.49                           | 0.9924         |
| <i>Harmanella vermiformis</i> | 16                                                 | -3.361 | 98.38                           | 0.9813         |
| Total bacteria (16S rRNA)     | 8                                                  | -3.360 | 98.43                           | 0.9910         |

Note: The amplification efficiency was calculated by the formula: Amplification efficiency =  $10^{-1/\text{slope}-1}$

**Table S3** Characteristics of water quality in different regions

| Area | Turbidity<br>(NTU) | Temperature<br>(°C) | pH        | TOC<br>(mg/L) | DO<br>(mg/L) | Total Fe<br>(µg/L) | particles<br>number |
|------|--------------------|---------------------|-----------|---------------|--------------|--------------------|---------------------|
| FC   | 0.30±0.28          | 18.87±7.12          | 8.05±0.33 | 1.88±0.61*    | 9.37±2.04    | 63.45±50.12        | 492±447             |
| TC   | 0.26±0.15          | 19.78±6.82          | 8.06±0.32 | 2.31±0.45*    | 9.36±1.5     | 59.51±40.76        | 389±535             |

\*, significant difference with 95% confidence ( $p < 0.05$ ) in two areas.

**Table S4** Number of particles with different sizes

| Area | 2~3 $\mu\text{m}$ | 3~5 $\mu\text{m}$ | 5~7 $\mu\text{m}$ | 7~10 $\mu\text{m}$ | 10~15 $\mu\text{m}$ | 15~20 $\mu\text{m}$ | 20~25 $\mu\text{m}$ | >25 $\mu\text{m}$ |
|------|-------------------|-------------------|-------------------|--------------------|---------------------|---------------------|---------------------|-------------------|
| FC   | 164 $\pm$ 149     | 222 $\pm$ 223     | 57 $\pm$ 57       | 30 $\pm$ 32        | 13 $\pm$ 18         | 5 $\pm$ 6           | 1 $\pm$ 2           | 1 $\pm$ 2         |
| TC   | 136 $\pm$ 173     | 168 $\pm$ 236     | 44 $\pm$ 65       | 25 $\pm$ 42        | 10 $\pm$ 19         | 4 $\pm$ 6           | 1 $\pm$ 2           | 2 $\pm$ 2         |

The value is expressed as mean $\pm$ SD. \*, significant difference with 95% confidence (p < 0.05) in the two areas.

**Table S5** Pearson correlation analysis between the microorganisms in all samples (n = 98).

|          | 16S rRNA | Myc                       | Ma                        | Leg                       | Lp                       | Ps                    | Ac                        | Hv                        |
|----------|----------|---------------------------|---------------------------|---------------------------|--------------------------|-----------------------|---------------------------|---------------------------|
| 16S rRNA | 1        | <b>0.323</b><br>(p=0.001) | 0.149<br>(p=0.142)        | <b>0.477</b><br>(p=0)     | 0.109<br>(p=0.285)       | <b>0.382</b><br>(p=0) | <b>0.408</b><br>(p=0)     | <b>0.228</b><br>(p=0.024) |
| Myc      |          | 1                         | <b>0.335</b><br>(p=0.001) | <b>0.343</b><br>(p=0.001) | -0.059<br>(p=0.562)      | 0.094<br>(p=0.356)    | <b>0.563</b><br>(p=0)     | -0.001<br>(p=0.99)        |
| Ma       |          |                           | 1                         | 0.106<br>(p=0.301)        | -0.023<br>(p=0.822)      | 0.19<br>(p=0.062)     | <b>0.286</b><br>(p=0.004) | 0.049<br>(p=0.63)         |
| Leg      |          |                           |                           | 1                         | <b>0.208</b><br>(p=0.04) | 0.009<br>(p=0.932)    | <b>0.415</b><br>(p=0)     | 0.107<br>(p=0.294)        |
| Lp       |          |                           |                           |                           | 1                        | 0.106<br>(p=0.3)      | 0.062<br>(p=0.545)        | 0.171<br>(p=0.093)        |
| Ps       |          |                           |                           |                           |                          | 1                     | 0.103<br>(p=0.315)        | 0.06<br>(p=0.55)7         |
| Ac       |          |                           |                           |                           |                          |                       | 1                         | 0.159<br>(p=0.119)        |
| Hv       | □        | □                         | □                         | □                         | □                        | □                     | □                         | 1                         |

The bold numbers represented significance under  $p < 0.05$ . Myc: *Mycobacterium* spp., Ma: *M. avium*, Leg: *Legionella* spp., Lp: *L. pneumophila*, Ps: *P. aeruginosa*, Ac: *Acanthamoeba* spp., Hv: *H. vermiformis*.

**Table S6** Pearson correlation analysis between the microorganisms in FC areas  
(n=60).

|          | 16S rRNA | Myc                       | Ma                        | Leg                       | Lp                  | Ps                        | Ac                        | Hv                  |
|----------|----------|---------------------------|---------------------------|---------------------------|---------------------|---------------------------|---------------------------|---------------------|
| 16S rRNA | 1        | <b>0.300</b><br>(p=0.020) | 0.157<br>(p=0.232)        | <b>0.489</b><br>(p=0)     | -0.029<br>(p=0.825) | <b>0.382</b><br>(p=0.003) | <b>0.460</b><br>(p=0)     | 0.213<br>(p=0.102)  |
| Myc      |          | 1                         | <b>0.417</b><br>(p=0.001) | <b>0.272</b><br>(p=0.035) | -0.085<br>(p=0.517) | 0.030<br>(p=0.818)        | <b>0.558</b><br>(p=0)     | -0.030<br>(p=0.819) |
| Ma       |          |                           | 1                         | 0.122<br>(p=0.355)        | -0.185<br>(p=0.157) | 0.225<br>(p=0.085)        | <b>0.311</b><br>(p=0.015) | -0.037<br>(p=0.777) |
| Leg      |          |                           |                           | 1                         | 0.245<br>(p=0.059)  | 0.012<br>(p=0.930)        | <b>0.287</b><br>(p=0.026) | 0.166<br>(p=0.204)  |
| Lp       |          |                           |                           |                           | 1                   | 0.064<br>(p=0.627)        | 0.036<br>(p=0.787)        | 0.150<br>(p=0.254)  |
| Ps       |          |                           |                           |                           |                     | 1                         | 0.143<br>(p=0.277)        | 0.216<br>(p=0.098)  |
| Ac       |          |                           |                           |                           |                     |                           | 1                         | 0.078<br>(p=0.553)  |
| Hv       |          |                           |                           |                           |                     |                           |                           | 1                   |

The bold numbers represented significance under  $p < 0.05$ . Myc: *Mycobacterium* spp., Ma: *M. avium*, Leg: *Legionella* spp., Lp: *L. pneumophila*, Ps: *P. aeruginosa*, Ac: *Acanthamoeba* spp., Hv: *H.vermiformis*.

**Table S7** Pearson correlation analysis between the microorganisms in TC areas

(n=38).

|          | 16S rRNA | Myc                | Ma                 | Leg                              | Lp                               | Ps                               | Ac                               | Hv                  |
|----------|----------|--------------------|--------------------|----------------------------------|----------------------------------|----------------------------------|----------------------------------|---------------------|
| 16S rRNA | 1        | 0.236<br>(p=0.154) | 0.312<br>(p=0.056) | 0.280<br>(p=0.089)               | <b>0.358</b><br><b>(p=0.027)</b> | <b>0.397</b><br><b>(p=0.014)</b> | 0.123<br>(p=0.463)               | 0.152<br>(p=0.363)  |
| Myc      |          | 1                  | 0.314<br>(p=0.055) | <b>0.348</b><br><b>(p=0.032)</b> | -0.070<br>(p=0.675)              | 0.186<br>(p=0.263)               | <b>0.498</b><br><b>(p=0.001)</b> | -0.064<br>(p=0.705) |
| Ma       |          |                    | 1                  | 0.228<br>(p=0.168)               | 0.259<br>(p=0.116)               | 0.161<br>(p=0.336)               | <b>0.392</b><br><b>(p=0.015)</b> | 0.226<br>(p=0.173)  |
| Leg      |          |                    |                    | 1                                | 0.099<br>(p=0.555)               | -0.047<br>(p=0.779)              | <b>0.500</b><br><b>(p=0.001)</b> | -0.108<br>(p=0.518) |
| Lp       |          |                    |                    |                                  | 1                                | 0.164<br>(p=0.324)               | 0.048<br>(p=0.774)               | 0.170<br>(p=0.307)  |
| Ps       |          |                    |                    |                                  |                                  | 1                                | -0.001<br>(p=0.993)              | -0.173<br>(p=0.300) |
| Ac       |          |                    |                    |                                  |                                  |                                  | 1                                | 0.165<br>(p=0.323)  |
| Hv       |          |                    |                    |                                  |                                  |                                  |                                  | 1                   |

The bold numbers represented significance under  $p < 0.05$ . Myc: *Mycobacterium* spp., Ma: *M. avium*, Leg: *Legionella* spp., Lp: *L. pneumophila*, Ps: *P. aeruginosa*, Ac: *Acanthamoeba* spp., Hv: *H. vermiformis*.



**Table S8** Pearson correlation between HPC and other indicators (FC areas: n=60, TC areas: n=38).

| Area | Tur              | Temp             | pH               | TOC              | DO               | Total Fe         | PN        |
|------|------------------|------------------|------------------|------------------|------------------|------------------|-----------|
| FC   | <b>0.279</b>     | 0.056            | -0.091           | <b>0.355</b>     | 0.013            | <b>0.417</b>     | 0.156     |
|      | <b>(p=0.031)</b> | (p=0.671)        | (p=0.490)        | <b>(p=0.005)</b> | (p=0.921)        | <b>(p=0.001)</b> | (p=0.232) |
| TC   | <b>0.334</b>     | <b>0.348</b>     | <b>-0.336</b>    | -0.117           | <b>0.364</b>     | <b>0.482</b>     | 0.125     |
|      | <b>(p=0.040)</b> | <b>(p=0.032)</b> | <b>(p=0.039)</b> | (p=0.485)        | <b>(p=0.025)</b> | <b>(p=0.002)</b> | (p=0.455) |

Tur: Turbidity, Temp: temperature, PN: particles number.

**Table S9** The Pearson correlation between microorganisms and water quality indicators (n=98).

| □        | Turbidity                 | Total iron                | Particles number           | 2~3μm                     | 3~5μm                     | 5~7μm                     | 7~10μm                     | 10~15μm                    | 15~20μm                    | 20~25μm                    | >25μm                      |
|----------|---------------------------|---------------------------|----------------------------|---------------------------|---------------------------|---------------------------|----------------------------|----------------------------|----------------------------|----------------------------|----------------------------|
| 16S rRNA | 0.196<br>(p=0.054)        | <b>0.349</b><br>(p=0)     | 0.026<br>(p=0.801)         | 0.004<br>(p=0.972)        | 0.024<br>(p=0.812)        | 0.04<br>(p=0.693)         | 0.08<br>(p=0.434)          | 0.078<br>(p=0.445)         | 0.052<br>(p=0.612)         | -0.08<br>(p=0.435)         | -0.178<br>(p=0.079)        |
| Myc      | <b>0.203</b><br>(p=0.045) | 0.025<br>(p=0.806)        | 0.176<br>(p=0.084)         | 0.195<br>(p=0.055)        | 0.137<br>(p=0.179)        | 0.161<br>(p=0.114)        | <b>0.216</b><br>(p=0.033)  | <b>0.204</b><br>(p=0.044)  | <b>0.219</b><br>(p=0.031)  | <b>0.201</b><br>(p=0.047)  | 0.136<br>(p=0.182)         |
| Ma       | <b>0.206</b><br>(p=0.042) | 0.058<br>(p=0.569)        | <b>0.2420</b><br>(p=0.017) | <b>0.238</b><br>(p=0.018) | <b>0.217</b><br>(p=0.032) | <b>0.227</b><br>(p=0.025) | <b>0.248</b><br>(p=0.014)  | <b>0.260</b><br>(p=0.01)   | <b>0.298</b><br>(p=0.003)  | <b>0.248</b><br>(p=0.014)  | 0.103<br>(p=0.315)         |
| Leg      | <b>0.296</b><br>(p=0.003) | <b>0.230</b><br>(p=0.022) | 0.144<br>(p=0.158)         | 0.171<br>(p=0.093)        | 0.106<br>(p=0.299)        | 0.105<br>(p=0.302)        | <b>0.200</b><br>(p=0.048)  | 0.194<br>(p=0.055)         | 0.179<br>(p=0.079)         | 0.142<br>(p=0.162)         | 0.091<br>(p=0.373)         |
| Lp       | -0.032<br>(p=0.757)       | 0.056<br>(p=0.586)        | <b>-0.206</b><br>(p=0.042) | -0.178<br>(p=0.079)       | -0.162<br>(p=0.111)       | <b>-0.220</b><br>(p=0.03) | <b>-0.348</b><br>(p=0)     | <b>-0.353</b><br>(p=0)     | <b>-0.316</b><br>(p=0.002) | <b>-0.352</b><br>(p=0)     | <b>-0.336</b><br>(p=0.001) |
| Ps       | <b>0.214</b><br>(p=0.034) | <b>0.228</b><br>(p=0.024) | 0.043<br>(p=0.671)         | 0.036<br>(p=0.723)        | 0.112<br>(p=0.274)        | 0.053<br>(p=0.601)        | -0.198<br>(p=0.051)        | <b>-0.273</b><br>(p=0.007) | -0.185<br>(p=0.068)        | -0.135<br>(p=0.186)        | -0.182<br>(p=0.072)        |
| Ac       | <b>0.314</b><br>(p=0.002) | 0.116<br>(p=0.257)        | <b>0.300</b><br>(p=0.003)  | <b>0.301</b><br>(p=0.003) | <b>0.285</b><br>(p=0.005) | <b>0.289</b><br>(p=0.004) | <b>0.260</b><br>(p=0.01)   | <b>0.203</b><br>(p=0.045)  | 0.186<br>(p=0.067)         | 0.174<br>(p=0.086)         | 0.145<br>(p=0.155)         |
| Hv       | -0.006<br>(p=0.953)       | 0.102<br>(p=0.318)        | -0.036<br>(p=0.724)        | -0.02<br>(p=0.843)        | 0.02<br>(p=0.842)         | -0.052<br>(p=0.614)       | <b>-0.230</b><br>(p=0.023) | <b>-0.280</b><br>(p=0.005) | <b>-0.245</b><br>(p=0.015) | <b>-0.215</b><br>(p=0.033) | <b>-0.273</b><br>(p=0.006) |
| HPC      | <b>0.529</b><br>(p=0)     | <b>0.390</b><br>(p=0)     | 0.034<br>(p=0.742)         | 0.064<br>(p=0.533)        | 0.044<br>(p=0.665)        | 0.013<br>(p=0.902)        | -0.062<br>(p=0.546)        | -0.094<br>(p=0.356)        | -0.069<br>(p=0.498)        | -0.086<br>(p=0.397)        | -0.116<br>(p=0.254)        |

The bold numbers represented significance under  $p < 0.05$ . Myc: *Mycobacterium* spp., Ma: *M. avium*, Leg: *Legionella* spp., Lp: *L. pneumophila*, Ps: *P. aeruginosa*, Ac: *Acanthamoeba* spp., Hv: *H. vermiformis*.

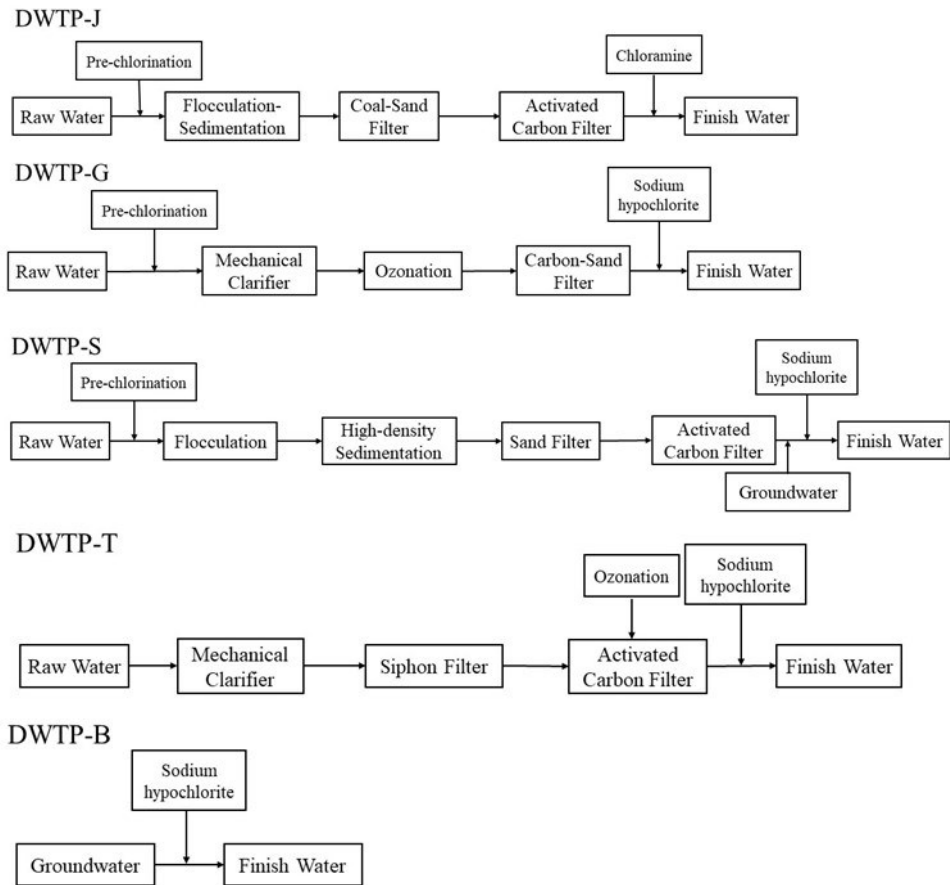

**Fig. S1** The main water treatment processes for the five drinking water treatment plants.

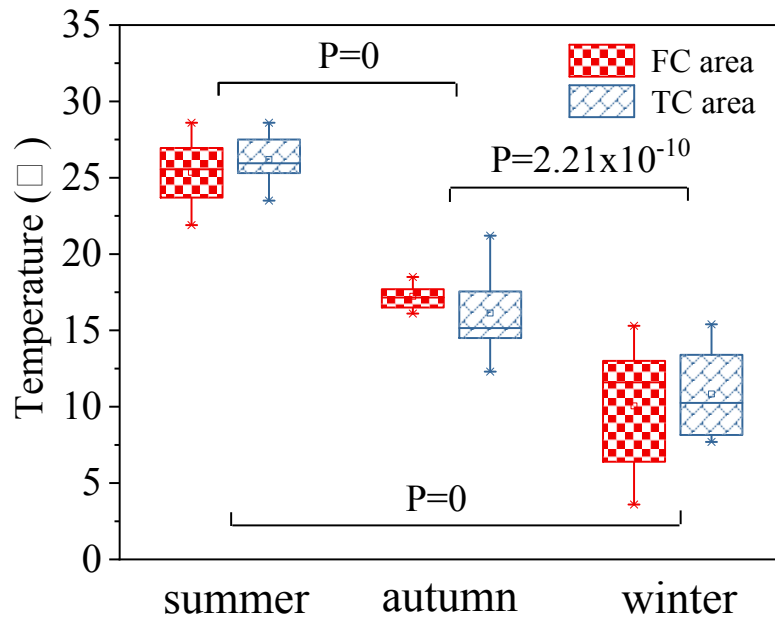

**Fig. S2** Temperature profiles in different seasons of the two areas.

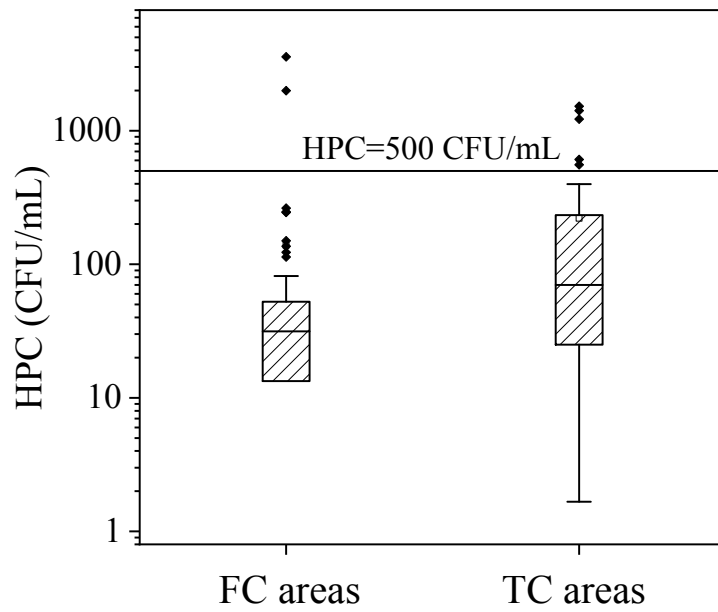

**Fig. S3** The distribution of HPC in free chlorine (FC) areas and total chlorine (TC) areas.

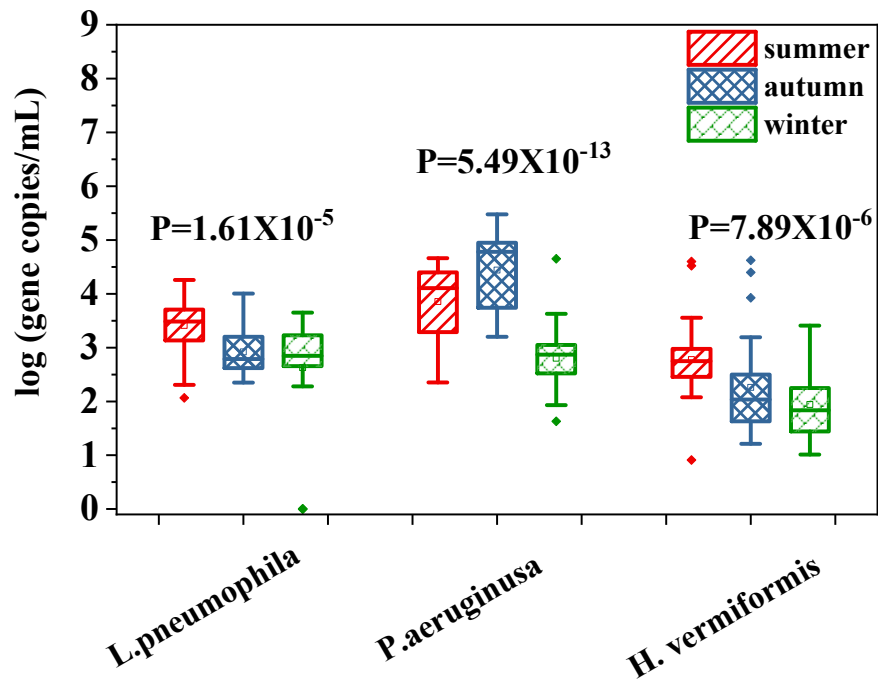

**Fig. S4** The seasonal differences of *L. pneumophila*, *P. aeruginosa*, and *H. vermiformis* for all the samples.

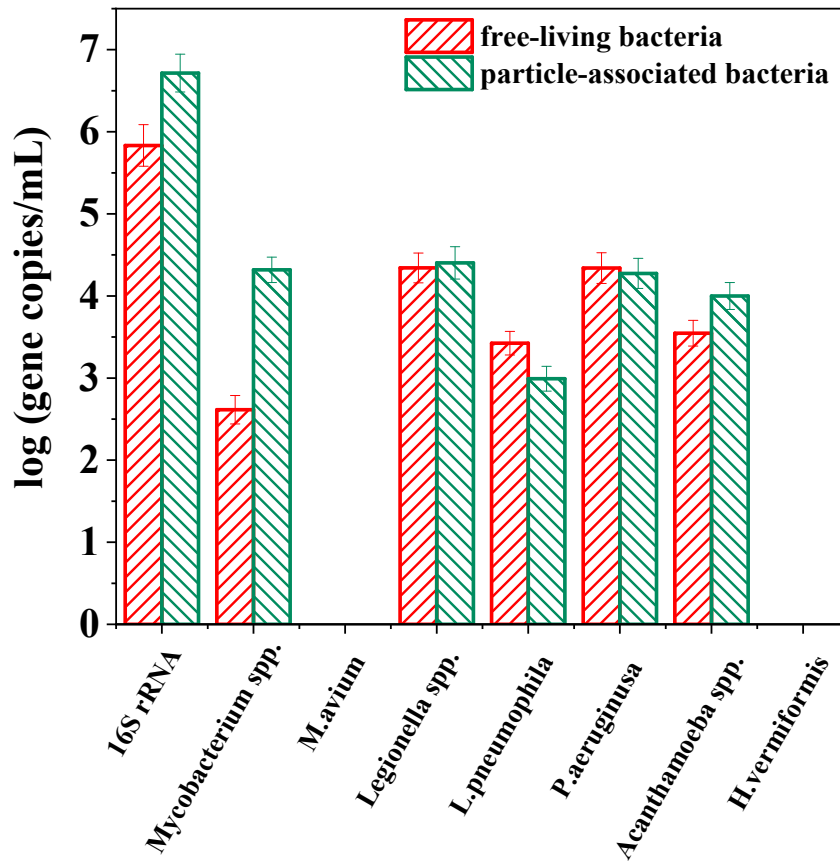

**Fig. S5** The free-living and particle-associated bacteria in tap water of drinking water distribution systems.

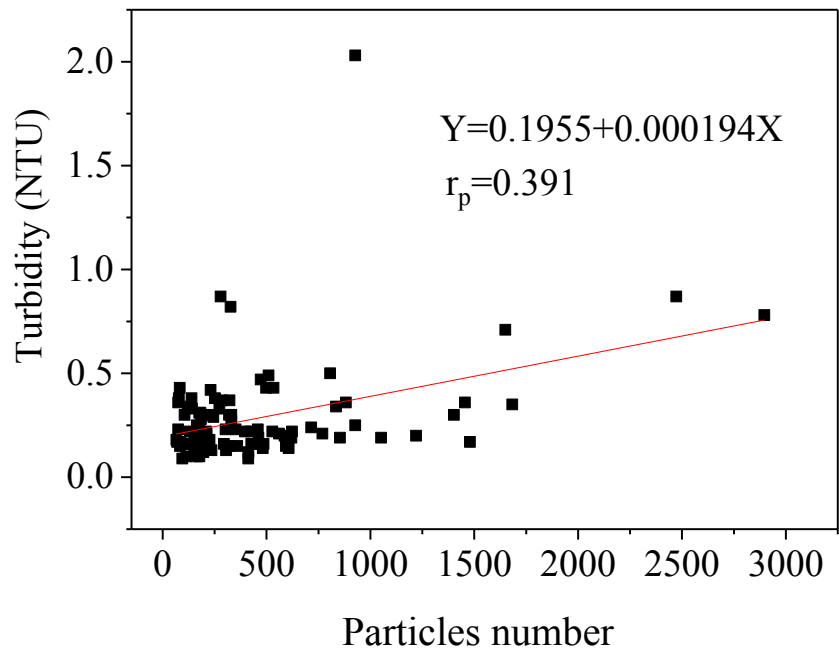

**Fig. S6** The Pearson's Rank correlation of particles number and turbidity. ( $r_p$ )



## References

- 1 H. Wang, M. Edwards, J.O. Falkinham and A. Pruden, Molecular survey of the occurrence of *legionella* spp., *mycobacterium* spp., *pseudomonas aeruginosa*, and amoeba hosts in two chloraminated drinking water distribution systems, Appl. Environ. Microbiol, 2012, 78, 6285–6294.
- 2 H.B. Wang, C. Hu, S.N. Zhang, L.Z. Liu and X.C. Xing, Effects of O3/Cl2 disinfection on corrosion and opportunistic pathogens growth in drinking water distribution systems, J. Environ. Sci. (China), 2018, 73, 38–46.
- 3 L.Z. Liu, X.C. Xing, C. Hu and H.B. Wang, One-year survey of opportunistic premise plumbing pathogens and free-living amoebae in the tap-water of one northern city of China, J. Environ. Sci. (China), 2019, 77, 20–31.
